# Supplementary material for: Engineering Lateral Heterojunction of Selenium‐Coated Tellurium Nanomaterials toward Highly Efficient Solar Desalination
Source: PubMed Central journal article supplement (PMC6774058; doi:10.1002/advs.201900531), 2019-08-17
Supplement: ADVS-6-1900531-s001.pdf [file ADVS-6-1900531-s001.pdf]

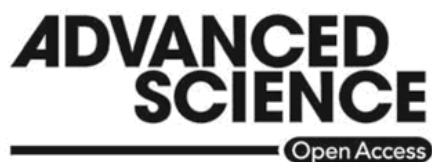

## Supporting Information

for *Adv. Sci.*, DOI: 10.1002/adv.201900531

Engineering Lateral Heterojunction of Selenium-Coated Tellurium Nanomaterials toward Highly Efficient Solar Desalination

*Chenyang Xing, Dazhou Huang, Shiyou Chen, Qichen Huang, Chuanhong Zhou, Zhengchun Peng, Jiagen Li, Xi Zhu,\* Yizhen Liu,\* Zhipeng Liu, Houkai Chen, Jinlai Zhao, Jiangqing Li, Liping Liu, Faliang Cheng, Dianyuan Fan, and Han Zhang\**

Supporting Information

## **Engineering Lateral Heterojunction of Selenium-Coated Tellurium Nanomaterials Towards Highly Efficient Solar Desalination**

Chenyang Xing,<sup>1,ab</sup> Dazhou Huang,<sup>1,ai</sup> Shiyou Chen,<sup>1,a</sup> Qichen Huang,<sup>1,d</sup>, Chuanhong Zhou,<sup>b</sup> Zhengchun Peng,<sup>b</sup> Jiagen Li,<sup>c</sup> Xi Zhu,<sup>c\*</sup> Yizhen Liu,<sup>d\*</sup>, Zhipeng Liu,<sup>d</sup> Houkai Chen,<sup>e</sup> Jinlai Zhao,<sup>fg</sup> Jiangqing Li,<sup>f</sup> Liping Liu,<sup>h</sup> Faliang Cheng,<sup>i</sup> Dianyuan Fan,<sup>a</sup> Han Zhang<sup>a\*</sup>

<sup>a</sup> Shenzhen Engineering Laboratory of Phosphorene and Optoelectronics, International Collaborative Laboratory of 2D Materials for Optoelectronics Science and Technology of Ministry of Education, College of Physics and Optoelectronic Engineering, Shenzhen University, Shenzhen 518060, China

<sup>b</sup> Center for Stretchable Electronics and Nanoscale Systems, Key Laboratory of Optoelectronic Devices and Systems of Ministry of Education, College of Physics and Optoelectronic Engineering, Shenzhen University, Shenzhen 518060, China

<sup>c</sup> School of Science and Engineering, The Chinese University of Hong Kong, Shenzhen, Shenzhen 518172, China

<sup>d</sup> College of Chemistry and Environmental Engineering, Shenzhen University, Shenzhen 518060, China

<sup>e</sup> Nanophotonics Research Center, Shenzhen Key Laboratory of Micro-Scale Optical Information Technology, Shenzhen University, Shenzhen 518060, China

<sup>f</sup> Faculty of Information Technology Macau University of Science and Technology, Avenida Wai Long, Taipa, Macau 999078, China

<sup>g</sup> College of Materials Science and Engineering, Shenzhen Key Laboratory of Polymer Science and Technology, Guangdong Research Center for Interfacial Engineering of Functional Materials, Shenzhen 518060, China

<sup>h</sup> Department of Hepatobiliary and Pancreatic Surgery, Shenzhen People's Hospital, Second Clinical Medical College of Jinan University, Shenzhen 518060, China

<sup>i</sup> Dongguan University of Technology, Dongguan 523808, China

<sup>⊥</sup> C. Y. Xing, D. Z. Huang, S. Y. Chen and Q. C. Huang contributed equally.

\* Corresponding author (E-mail: [h Zhang@szu.edu.cn](mailto:h Zhang@szu.edu.cn); [y zliu@szu.edu.cn](mailto:y zliu@szu.edu.cn); [zhuxi@cuhk.edu.cn](mailto:zhuxi@cuhk.edu.cn))

## Contents

**Table S1** Weight percent values of Te phase, Se phase, and PVP component in the Te-Se-based nanomaterials, determined by inductively coupled plasma-atomic emission spectroscopy (ICP-AES, OPTIMA2100DV, PerkinElmer).

**Table S2** The zeta potential of DI water, PVP solution and Te-Se (1/1) solution at 25 °C.

**Table S3** Comparison of Te-Se@PDDA@MS vapor generation performance and previous reports. The  $\eta$ ,  $R$ , NPs, GBMCC, CNTs denote evaporation efficiency, evaporation rate, nanoparticles, geopolymer-biomass mesoporous carbon composite and carbon nanotubes, respectively. The symbol of “-” means this kind of data had not been mentioned in the literatures.

**Table S4** Evaporation efficiency ( $\eta$ , %), evaporation rate ( $R$ ,  $\text{kg}\cdot\text{m}^{-2}\cdot\text{h}^{-1}$ ) of Te-Se (1/1) @PDDA@MS samples with various loading level ( $W$ , wt%) of Te-Se (1/1) nanomaterials for DI water, NaCl solution (3.5 wt%), and  $\text{MgCl}_2$  solution (3.5 wt%) under a solar intensity of 10 sun (1 sun =  $1\text{ kW}\cdot\text{m}^{-2}$ ). Weight changes ( $\Delta W$ , wt%) of the MS samples before and after measurements are also shown.

**Table S5** The synthesis information of all samples in this study.

**Fig. S1** Chemical structures of PDDA (a, b), MS (c) and PVP, and their ATR-FTIR spectra relative to Te-Se (1/1) decorated PDDA@MS sample.

**Fig. S2** (a) Photographs of neat MS, PDDA@MS, Te-Se@PDDA@MS with Te-Se loadings of 39.3 wt%, 74.1 wt%, 103.4 wt% and 133.4 wt%, respectively (from left to right); The free states (b) and bending states (c) of Te-Se@PDDA@MS with a Te-Se loading of 133.4 wt% in boiling water and room-temperature water.

**Fig. S3** SEM images illustrating the surface morphology of neat MS without any treatment.

**Table S1** Weight percent values of Te phase, Se phase, and PVP component in the Te-Se-based nanomaterials, determined by inductively coupled plasma-atomic emission spectroscopy (ICP-AES, OPTIMA2100DV, PerkinElmer).

| Sample name    | Te Phase<br>(wt%) | Se Phase<br>(wt%) | PVP<br>(wt%) | Molar ratio of<br>Te to Se<br>(Theory) | Molar ratio of<br>Te to Se<br>(Experiments) |
|----------------|-------------------|-------------------|--------------|----------------------------------------|---------------------------------------------|
| Te-Se (1/0.25) | 48.2              | 6.4               | 45.4         | 4                                      | 4.67                                        |
| Te-Se (1/0.5)  | 46.0              | 11.3              | 42.7         | 2                                      | 2.52                                        |
| Te-Se (1/0.75) | 43.1              | 15.6              | 41.3         | 1.33                                   | 1.71                                        |
| Te-Se (1/1)    | 39.6              | 18.4              | 42           | 1                                      | 1.33                                        |

**Table S2** The zeta potential of DI water, PVP solution and Te-Se (1:1) solution at 25 °C.

| Materials         | Zeta Potential (mV) |
|-------------------|---------------------|
| Water             | $8.6 \pm 1.8$       |
| PVP/Water         | $4.93 \pm 0.88$     |
| Te-Se (1/1)/Water | $19.2 \pm 1.1$      |

**Table S3** Comparison of Te-Se@PDDA@MS vapor generation performance and previous reports. The  $\eta$ , R, NPs, GBMCC, CNTs denote evaporation efficiency, evaporation rate, nanoparticles, geopolymer-biomass mesoporous carbon composite and carbon nanotubes, respectively. The symbol of “-” means this kind of data had not been mentioned in the literatures.

| Materials                     | Structures                                            | Biocompatible<br>; Degradable | $\eta$                                                                                                                                                                          | R<br>( $\text{kg}\cdot\text{m}^{-2}\cdot\text{h}^{-1}$ )                                                                                                                          | Water Source  | Salting-<br>Out | Refere<br>nce |
|-------------------------------|-------------------------------------------------------|-------------------------------|---------------------------------------------------------------------------------------------------------------------------------------------------------------------------------|-----------------------------------------------------------------------------------------------------------------------------------------------------------------------------------|---------------|-----------------|---------------|
| MXene $\text{Ti}_3\text{C}_2$ | 3D Thin Membrane                                      | Yes; Yes                      | 84% (1 sun)                                                                                                                                                                     | 1.33 (1 sun)                                                                                                                                                                      | Fresh water   | –               | 1             |
| Au NPs                        | 3D Au@<br>Filter Paper                                | Yes; NO                       | 79% (0.9 sun)<br>89% (10 sun)                                                                                                                                                   | 0.97 (0.9 sun)                                                                                                                                                                    | Fresh water   | Yes             | 2             |
| Black Au                      | 3D Au@<br>Sponges                                     | –; NO                         | 90.3% (10 sun)                                                                                                                                                                  | 12.74 (10 sun)                                                                                                                                                                    | NaCl solution | NO              | 3             |
| GBMCC                         | 3D Porous Structure                                   | Yes; NO                       | 84.95% (1 sun)                                                                                                                                                                  | 1.58 (1 sun)                                                                                                                                                                      | NaCl solution | –               | 4             |
| $\text{CuFeSe}_2$ NP          | 3D NP@Wood<br>Membrane                                | –; NO                         | 67.7% (1 sun)<br>86.2% (5 sun)                                                                                                                                                  | 6.6 (5 sun)                                                                                                                                                                       | Fresh water   | –               | 5             |
| Graphene                      | 3D foam                                               | –; NO                         | 91.4% (1 sun)                                                                                                                                                                   | 1.4 (1 sun)                                                                                                                                                                       | Sea Water     | –               | 6             |
| $\text{Ti}_2\text{O}_3$ NPs   | 3D $\text{Ti}_2\text{O}_3$ @<br>Cellulose<br>Membrane | –; NO                         | 92.1±3.2 %<br>(1 sun)                                                                                                                                                           | 1.32 (1 sun)<br>5.03 (5 sun)                                                                                                                                                      | Sea Water     | –               | 7             |
| CNTs                          | 3D CNT@Filter<br>Paper                                | –; NO                         | 75 % (1 sun)                                                                                                                                                                    | 1.15 (1 sun)                                                                                                                                                                      | Sea Water     | –               | 8             |
| Polypyrrole                   | 3D Porous hydrogel                                    | –; NO                         | 94 % (1 sun)                                                                                                                                                                    | 3.2 (1 sun)                                                                                                                                                                       | NaCl solution | –               | 9             |
| Te NPs                        | 1D nanoparticel                                       | –; NO                         | –                                                                                                                                                                               | –                                                                                                                                                                                 | Fresh water   | –               | 10            |
| 2D Te-Se                      | 3D Te-Se@Sponges                                      | Yes; NO                       | 93.39±0.49<br>(10 sun) for<br>fresh water<br>90.71±0.37<br>(10 sun) for<br>NaCl (aq)<br>89.82±0.28<br>(10 sun) for<br>MgCl <sub>2</sub> (aq)<br>86.14% (1 sun)<br>for NaCl (aq) | 13.26±0.069<br>(10 sun) for<br>fresh water<br>12.88±0.052<br>(10 sun)<br>for NaCl (aq)<br>12.75±0.040<br>(10 sun)<br>for MgCl <sub>2</sub> (aq)<br>1.323 (1 sun)<br>for NaCl (aq) | NaCl solution | NO              | This<br>Work  |

## References:

1. R. Li, L. Zhang and P. Wang, *ACS Nano*, 2017, **4**, 3752.
2. Z. Liu, Z. Yang, X. Huang, C. Xuan, J. Xie, H. Fu, Q. Wu, J. Zhang, X. Zhou and Y. Liu, *J. Mater. Chem. A.*, 2017, **5**, 20044.
3. Y. Liu, Z. Liu, Q. Huang, X. Liang, X. Zhou, H. Fu, Q. Wu, J. Zhang and W. Xie, *J. Mater. Chem. A*, 2018, DOI: 10.1039/C8TA10227A.
4. F. Liu, B. Zhao, W. Wu, H. Yang, Y. Ning, Y. Lai and R. Bradley, *Adv. Funct. Mater.*, 2018, **28**, 1803266.
5. H. Liu, C. Chen, H. Wen, R. Guo, N. A. Williams, B. Wang, F. Chen and L. Hu, *J. Mater. Chem. A*, 2018, **6**, 18839.
6. H. Ren, M. Tang, B. Guan, K. Wang, J. Yang, F. Wang, M. Wang, J. Shan, Z. Chen, D. Wei, H. Peng and Z. Liu, *Adv. Mater.*, 2017, **29**, 1702590.
7. J. Wang, Y. Li, L. Deng, N. Wei, Y. Weng, S. Dong, D. Qi, J. Qiu, X. Chen and T. Wu, *Adv. Mater.*, 2017, **29**, 1603730.
8. P. Yang, K. Liu, Q. Chen, J. Li, J. Duan, G. Xue, Z. Xu, W. Xie and J. Zhou, *Energy Environ. Sci.*, 2017, **10**, 1923.
9. F. Zhao, X. Zhou, Y. Shi, X. Qian, M. Alexander, X. Zhao, S. Mendez, R. Yang, L. Qu and G. Yu, *Nat. Nanotech.*, 2018, **13**, 489.
10. C. Ma, J. Yan, Y. Huang, C. Wang and G. Yang, *Sci. Adv.*, 2018, **4**, eaas9894.

**Table S4** Evaporation efficiency ( $\eta$ , %), evaporation rate ( $R$ ,  $\text{kg}\cdot\text{m}^{-2}\cdot\text{h}^{-1}$ ) of Te-Se (1/1) @PDDA@MS samples with various loading level ( $W$ , wt%) of Te-Se (1/1) nanomaterials for DI water, NaCl solution (3.5 wt%), and  $\text{MgCl}_2$  solution (3.5 wt%) under a solar intensity of 10 sun (1 sun =  $1\text{ kW}\cdot\text{m}^{-2}$ ). Weight changes ( $\Delta W$ , wt%) of the MS samples before and after measurements are also shown.

| Samples                                         | W<br>(wt%) | $\Delta W$<br>(wt %) | $\eta$ for<br>DI<br>water (%) | R for DI<br>water<br>( $\text{kg}\cdot\text{m}^{-2}\cdot\text{h}^{-1}$ ) | $\eta$ for<br>NaCl<br>solution (%) | R for<br>NaCl solution<br>( $\text{kg}\cdot\text{m}^{-2}\cdot\text{h}^{-1}$ ) | $\eta$ for<br>MgCl <sub>2</sub><br>solution (%) | R for<br>MgCl <sub>2</sub> solution<br>( $\text{kg}\cdot\text{m}^{-2}\cdot\text{h}^{-1}$ ) |
|-------------------------------------------------|------------|----------------------|-------------------------------|--------------------------------------------------------------------------|------------------------------------|-------------------------------------------------------------------------------|-------------------------------------------------|--------------------------------------------------------------------------------------------|
| <b>Sample 1</b> (DI water)                      | 39.3       | < 2.0                | 92.2±0.42                     | 13.09±0.059                                                              | –                                  | –                                                                             | –                                               | –                                                                                          |
| <b>Sample 1</b><br>(NaCl or MgCl <sub>2</sub> ) | 41.0       | < 2.0                | –                             | –                                                                        | 89.22±0.49                         | 12.67±0.069                                                                   | 88.62±0.37                                      | 12.59±0.053                                                                                |
| <b>Sample 2</b> (DI water)                      | 74.1       | < 2.0                | 93.39±0.49                    | 13.26±0.069                                                              | –                                  | –                                                                             | –                                               | –                                                                                          |
| <b>Sample 2</b><br>(NaCl or MgCl <sub>2</sub> ) | 75.5       | < 2.0                | –                             | –                                                                        | 90.71±0.37                         | 12.88±0.052                                                                   | 89.82±0.28                                      | 12.75±0.040                                                                                |
| <b>Sample 3</b> (DI water)                      | 103.4      | < 2.0                | 92.80±0.14                    | 13.17±0.020                                                              | –                                  | –                                                                             | –                                               | –                                                                                          |
| <b>Sample 3</b><br>(NaCl or MgCl <sub>2</sub> ) | 104.1      | < 2.0                | –                             | –                                                                        | 90.71±0.48                         | 12.88±0.069                                                                   | 89.82±0.56                                      | 12.75±0.079                                                                                |
| <b>Sample 4</b> (DI water)                      | 133.4      | < 2.0                | 92.79±0.64                    | 13.17±0.091                                                              | –                                  | –                                                                             | –                                               | –                                                                                          |
| <b>Sample 4</b><br>(NaCl or MgCl <sub>2</sub> ) | 140.7      | < 2.0                | –                             | –                                                                        | 90.41±0.37                         | 12.84±0.052                                                                   | 89.52±0.24                                      | 12.71±0.034                                                                                |

**Table S5** The synthesis information of all samples in this study.

| Sample names   | Mass of<br>Na <sub>2</sub> TeO <sub>3</sub><br>(mg) | Mass of<br>Na <sub>2</sub> SeO <sub>3</sub><br>(mg) | Initial molar<br>ratio: Na <sub>2</sub> TeO <sub>3</sub> /<br>Na <sub>2</sub> SeO <sub>3</sub> | Mass of<br>PVP<br>(mg) | H <sub>2</sub> O<br>(mL) | N <sub>2</sub> H <sub>4</sub> •<br>H <sub>2</sub> O<br>(mL) | NH <sub>3</sub> •<br>H <sub>2</sub> O<br>(mL) |
|----------------|-----------------------------------------------------|-----------------------------------------------------|------------------------------------------------------------------------------------------------|------------------------|--------------------------|-------------------------------------------------------------|-----------------------------------------------|
| Te-Se (1/0)    | 221.57                                              | 0                                                   | 1:0                                                                                            | 100                    | 50                       | 5                                                           | 5                                             |
| Te-Se (1/0.25) | 221.57                                              | 43.235                                              | 1:0.25                                                                                         | 100                    | 50                       | 5                                                           | 5                                             |
| Te-Se (1/0.5)  | 221.57                                              | 86.47                                               | 1:0.5                                                                                          | 100                    | 50                       | 5                                                           | 5                                             |
| Te-Se (1/0.75) | 221.57                                              | 129.705                                             | 1:0.75                                                                                         | 100                    | 50                       | 5                                                           | 5                                             |
| Te-Se (1/1)    | 221.57                                              | 172.94                                              | 1:1                                                                                            | 100                    | 50                       | 5                                                           | 5                                             |



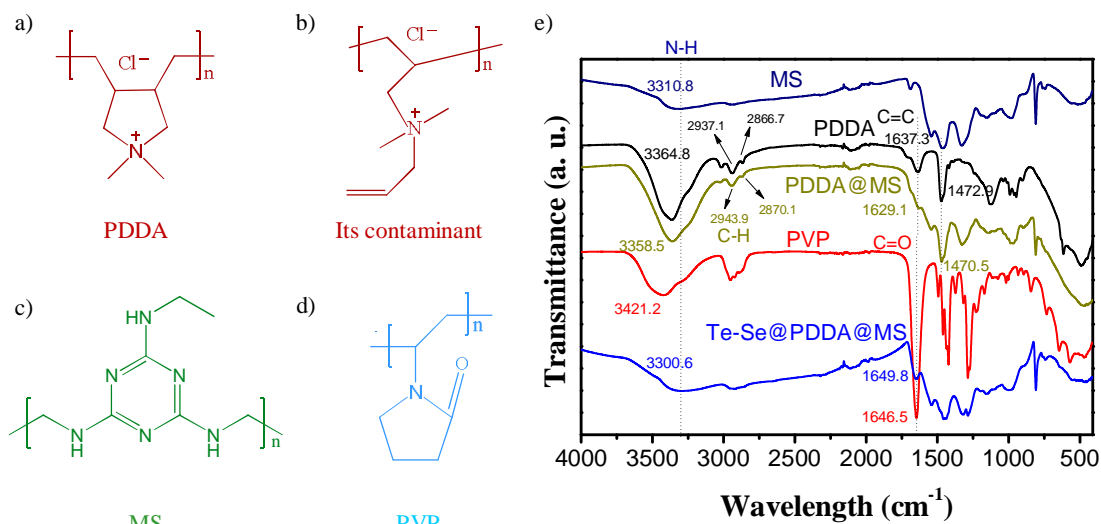

**Fig. S1** Chemical structures of PDDA (a, b), MS (c) and PVP, and their ATR-FTIR spectra relative to Te-Se (1/1) decorated PDDA@MS sample.

According to Sacher et al,<sup>1</sup> poly(diallyl dimethylammonium) chloride (PDDA), a positively charged polyelectrolyte, can well interact with carbon nanotubes (CNTs) via a straightforward  $\pi$ - $\pi$  interaction. And PDDA (**Fig. S1 a**) is frequently mixed with its contaminant (**Fig. S1 b**) which is formed during the polymerization of the monomer and can be considered as an unsaturated impurity. Its presence can be sufficiently high for orbital overlap, thus permitting  $\pi^* \leftarrow \pi$  transitions between PDDA and CNTs.

In this work, given its similar C=C formed  $\pi$ -conjugated system to CNTs (**Fig. S1 c**), MS was first modified by PDDA. As shown in **Fig. S1 e**, peak at 1637.3 and 1472.9 cm<sup>-1</sup> of PDDA, assigned to unsaturated C=C bonds of PDDA,<sup>1</sup> shift to low-wavelength of 1629.1 and 1470.5 cm<sup>-1</sup> in the case of PDDA@MS, the formed of which is accompanied with a significant decrease in intensity. This means a similar  $\pi$ - $\pi$  interaction between PDDA and MS. It is also observed that peaks at 2937.1 and 2886.7 cm<sup>-1</sup> from C—H stretching vibration of methylene as well as peaks at 3364.8 cm<sup>-1</sup> possibly from stretching vibration of O—H of water absorbed onto PDDA in PDDA sample are significantly shifted to higher- and lower-wavelength, respectively,

in the case of PDDA@MS, which may be ascribed to possible hydrogen-bonding interactions between positively charged  $N^+$  of PDDA and  $H-NH-R$  of MS. Compared to neat MS at  $3310.8\text{ cm}^{-1}$  from stretching vibration of  $N-H$ ,<sup>2</sup> such a hydrogen-bonding interaction in the PDDA@MS case is also obviously. Therefore, it can be concluded that PDDA can interaction with MS via both  $\pi-\pi$  interaction and H-bonding interactions.

As for Te-Se @PDDA@MS, the peak at  $1649.8\text{ cm}^{-1}$  assigned to  $C=O$  (**Fig. S1 d**) from PVP has a about 3 shifts of wavelength compared with that of  $1646.5\text{ cm}^{-1}$  for PVP. Meanwhile, a peak at  $3300.6\text{ cm}^{-1}$  from stretching vibration of  $N-H$  in Te-Se @PDDA@MS also has a significant red-shift phenomenon relative to  $3358.5\text{ cm}^{-1}$  of neat PVP and  $3310.8\text{ cm}^{-1}$  of neat MS, indicating that a possible H-bonding interaction of PVP and MS.

In summary, a robust adhesion of Te-Se nanomaterials onto PDDA@MS can attributed to strong physical interactions, such as  $\pi-\pi$  interaction (PDDA and MS), H-bonding interactions (PDDA and MS; PVP and MS) and possible electrostatic interaction (positively charged PDDA and negatively charged Te-Se nanomaterials).

### References:

- (1) D. Yang, J. F. Rochette and E. Sacher, *J. Phys. Chem. B* 2005, **109**, 4481-4484.
- (2) W. Zhang, X. Zhai, T. Xiang, M. Zhou, D. Zang, Z. Gao and C. Wang, *J. Mater. Sci.*, 2017, **52**, 73–85.

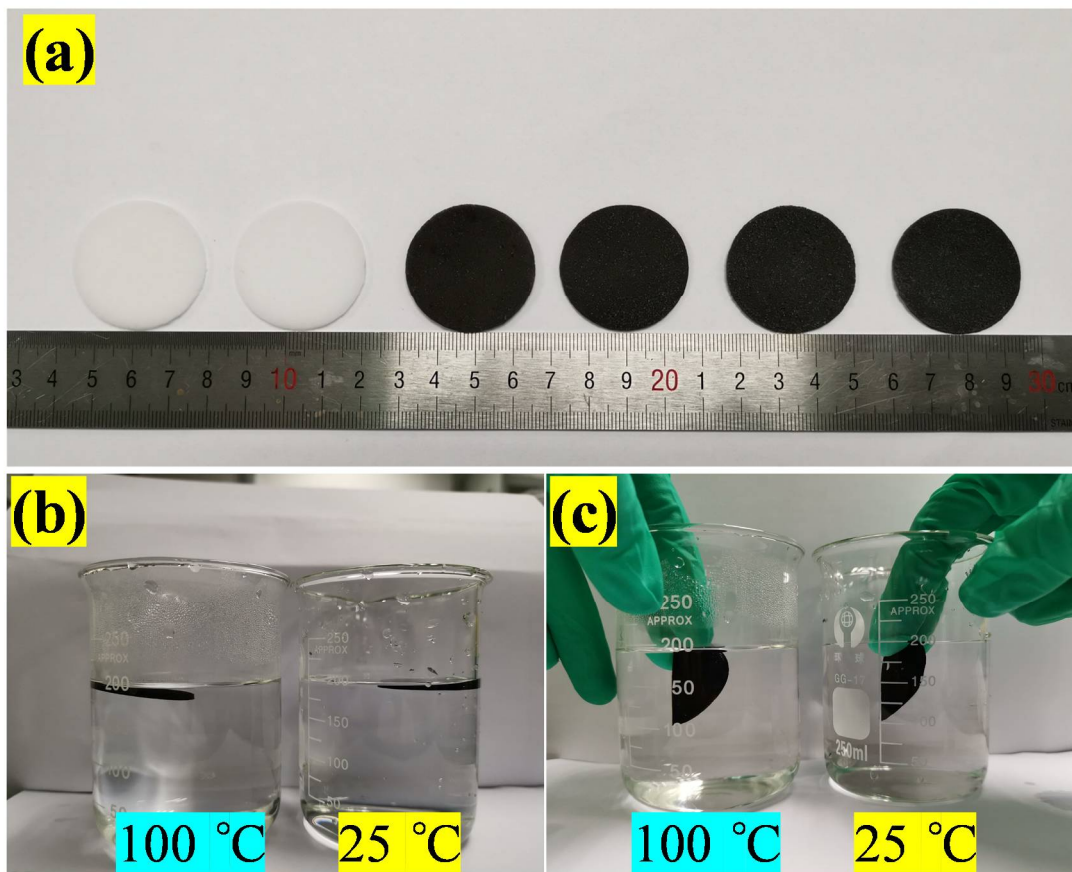

**Fig. S2** (a) Photographs of neat MS, PDDA@MS, Te-Se@PDDA@MS with Te-Se loadings of 39.3 wt%, 74.1 wt%, 103.4 wt% and 133.4 wt%, respectively (from left to right); The free states (b) and bending states (c) of Te-Se@PDDA@MS with a Te-Se loading of 133.4 wt% in boiling water and room-temperature water.

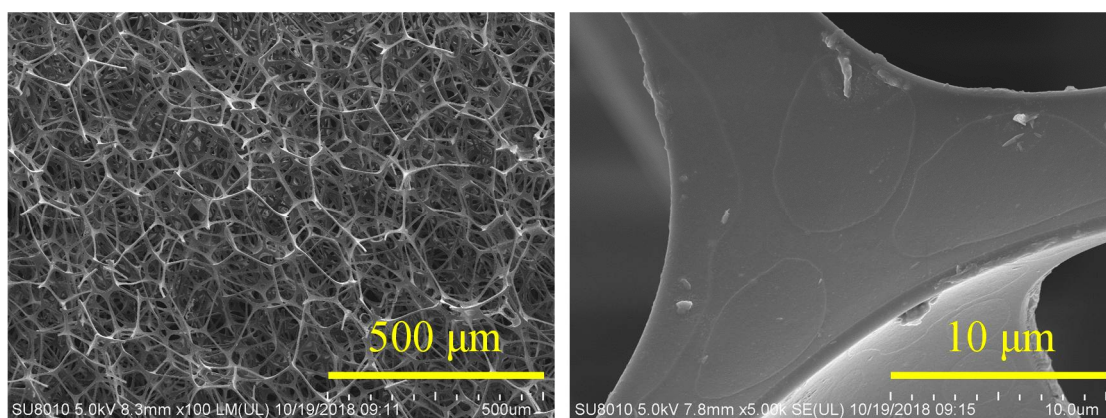

**Fig. S3** SEM images illustrating the surface morphology of neat MS without any treatment.
